# Supplementary figures and images for: Coincident measurement of photo-ion circular dichroism and photo-electron circular dichroism in 1-phenylethylamine
Source: Royal Society of Chemistry journal article supplement (doi:10.1039/d2cp01418a), 2022-01-01

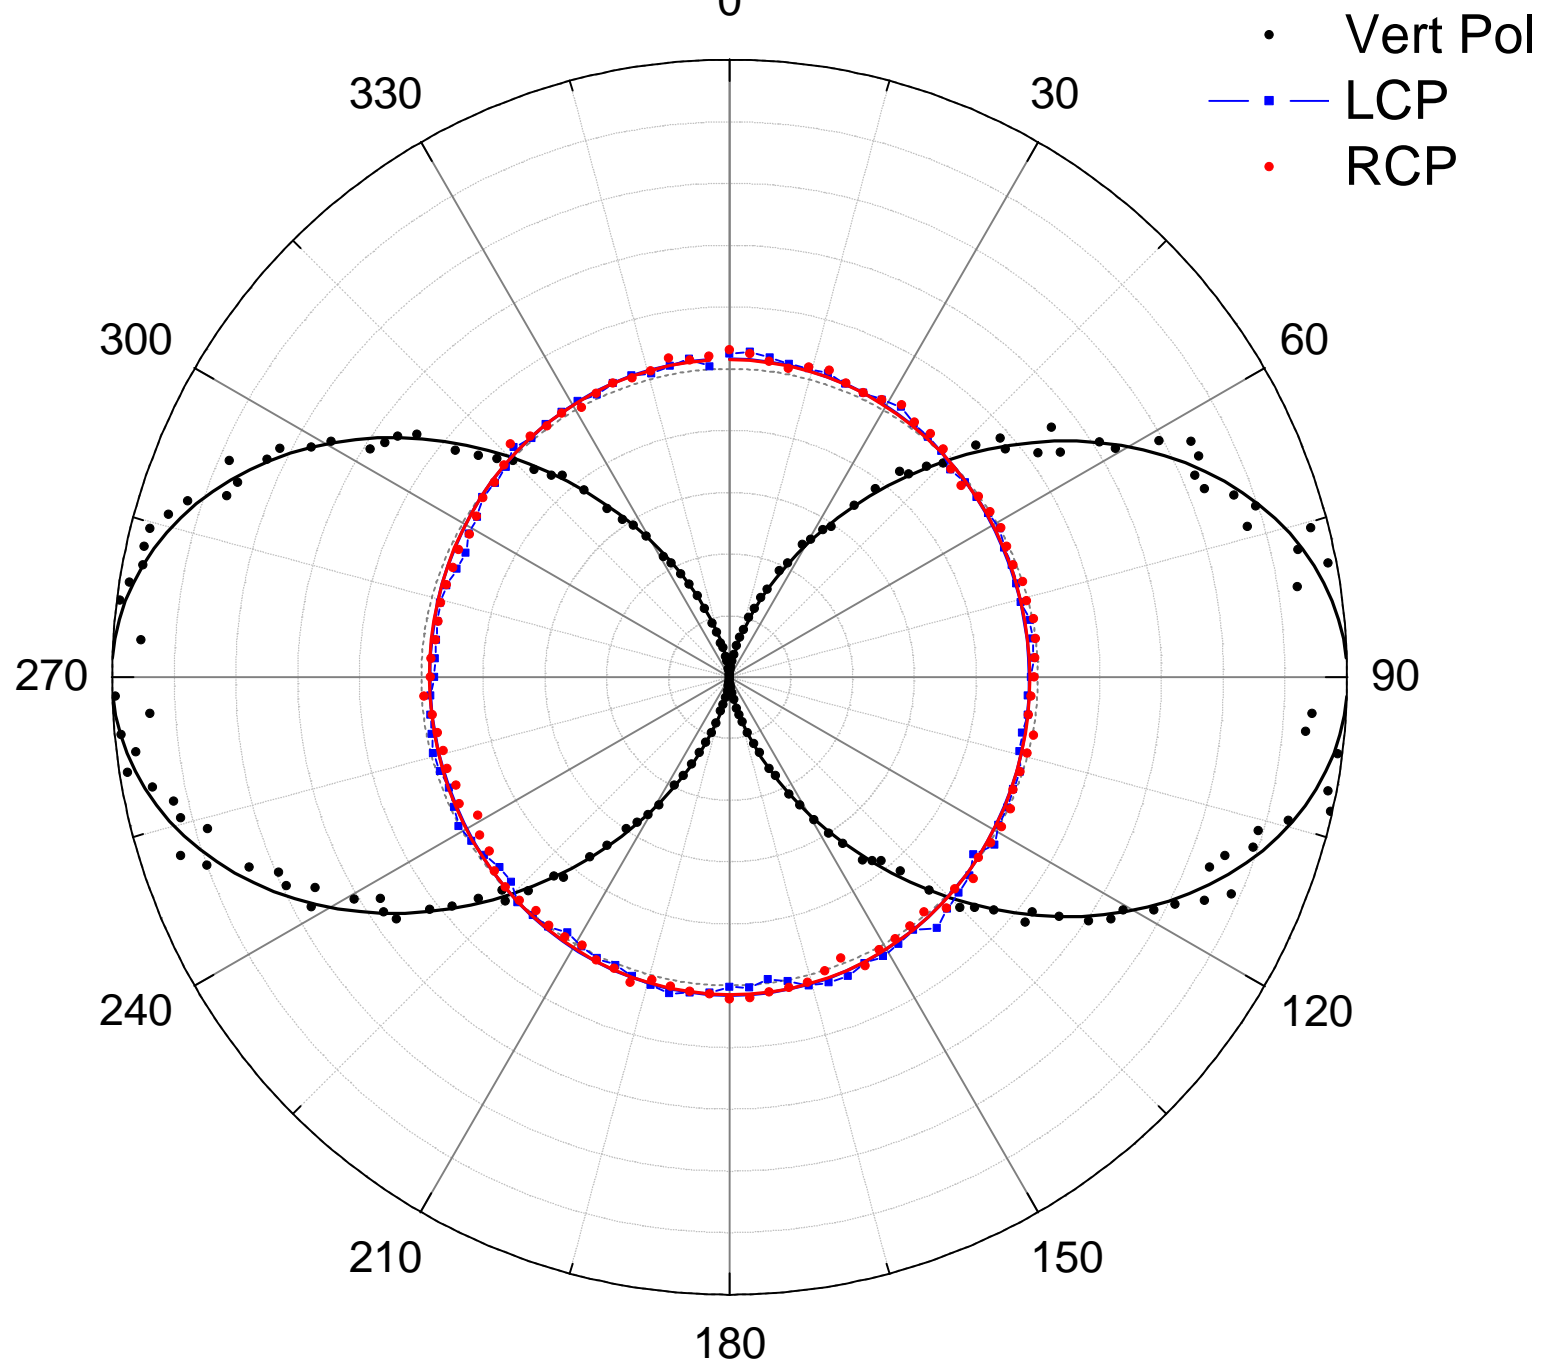

Supplement: d2cp01418a2.pdf [file d2cp01418a2.pdf]
